# Supplementary material for: Well London Phase-1: results among adults of a cluster-randomised trial of a community engagement approach to improving health behaviours and mental well-being in deprived inner-city neighbourhoods
Source: PubMed Central journal article supplement — J Epidemiol Community Health. 2014 Jan 31;68(7):606–14. doi: 10.1136/jech-2013-202505 (PMC4112422; doi:10.1136/jech-2013-202505), 2014-01-31
Supplement: jech-2013-202505-s2.pdf [file jech-2013-202505-s2.pdf]

Quarter of Well London project delivery

|           | Q6   |  |  |  | Q7 |  |  |  | Q8 |  |  |  | Q9 |  |  |  | Q10 |  |  |  |
|-----------|------|--|--|--|----|--|--|--|----|--|--|--|----|--|--|--|-----|--|--|--|
| Borough A | WLDT |  |  |  |    |  |  |  |    |  |  |  |    |  |  |  |     |  |  |  |
| Borough B |      |  |  |  |    |  |  |  |    |  |  |  |    |  |  |  |     |  |  |  |
| Borough C |      |  |  |  |    |  |  |  |    |  |  |  |    |  |  |  |     |  |  |  |
| Borough D |      |  |  |  |    |  |  |  |    |  |  |  |    |  |  |  |     |  |  |  |
| Borough E |      |  |  |  |    |  |  |  |    |  |  |  |    |  |  |  |     |  |  |  |
| Borough F |      |  |  |  |    |  |  |  |    |  |  |  |    |  |  |  |     |  |  |  |
| Borough G |      |  |  |  |    |  |  |  |    |  |  |  |    |  |  |  |     |  |  |  |
| Borough H |      |  |  |  |    |  |  |  |    |  |  |  |    |  |  |  |     |  |  |  |
| Borough I |      |  |  |  |    |  |  |  |    |  |  |  |    |  |  |  |     |  |  |  |
| Borough J | CM   |  |  |  |    |  |  |  |    |  |  |  |    |  |  |  |     |  |  |  |
| Borough K |      |  |  |  |    |  |  |  |    |  |  |  |    |  |  |  |     |  |  |  |
| Borough L |      |  |  |  |    |  |  |  |    |  |  |  |    |  |  |  |     |  |  |  |
| Borough M | CM   |  |  |  |    |  |  |  |    |  |  |  |    |  |  |  |     |  |  |  |
| Borough N |      |  |  |  |    |  |  |  |    |  |  |  |    |  |  |  |     |  |  |  |
| Borough O |      |  |  |  |    |  |  |  |    |  |  |  |    |  |  |  |     |  |  |  |
| Borough P |      |  |  |  |    |  |  |  |    |  |  |  |    |  |  |  |     |  |  |  |
| Borough Q |      |  |  |  |    |  |  |  |    |  |  |  |    |  |  |  |     |  |  |  |
| Borough R |      |  |  |  |    |  |  |  |    |  |  |  |    |  |  |  |     |  |  |  |
| Borough S |      |  |  |  |    |  |  |  |    |  |  |  |    |  |  |  |     |  |  |  |
| Borough T |      |  |  |  |    |  |  |  |    |  |  |  |    |  |  |  |     |  |  |  |

Quarter of Well London project delivery

|           | Q11         |             |                   |             | Q12         |             |                   |             | Q13         |             |             |             | Q14         |             |        |        |        |        |        |
|-----------|-------------|-------------|-------------------|-------------|-------------|-------------|-------------------|-------------|-------------|-------------|-------------|-------------|-------------|-------------|--------|--------|--------|--------|--------|
| Borough A | Dark Purple | Red         | Green             | Light Green | Red         | Green       | Light Green       | Orange      | Dark Purple | Green       | Light Green | Yellow      | Orange      | Dark Purple | Red    | Yellow |        |        |        |
| Borough B | Dark Purple | Red         | Orange            | Dark Purple | Red         | Orange      | Dark Purple       | Red         | Green       | Dark Purple | Red         | Green       | Dark Purple | Yellow      |        |        |        |        |        |
| Borough C | Dark Purple | Red         | Green             | Light Green | Orange      | Dark Purple | Red               | Green       | Light Green | Orange      | Red         | Green       | Light Green | Red         | Green  |        |        |        |        |
| Borough D | Dark Purple | Red         | Dark Purple       | Red         | Orange      | Dark Purple | Red               | Orange      | Dark Purple | Red         | Orange      | Dark Purple | Red         | Yellow      | Yellow | Orange |        |        |        |
| Borough E | Dark Purple | Red         | Green             | Light Green | Orange      | Dark Purple | Red               | Light Green | Orange      | Red         | Light Green | Orange      | Dark Purple | Red         | Orange |        |        |        |        |
| Borough F | Dark Purple | Red         | Green             | Light Green | Orange      | Dark Purple | Red               | Light Green | Orange      | Green       | Light Green | Orange      | Dark Purple | Green       | Orange |        |        |        |        |
| Borough G | Dark Purple | Red         | Green             | Dark Purple | Red         | Green       | Dark Purple       | Red         | Green       | Green       | Yellow      |             |             |             |        |        |        |        |        |
| Borough H | Dark Purple | Red         | Orange            | Dark Purple | Green       | Orange      | Dark Purple       | Green       | Orange      | Green       | Orange      |             |             |             |        |        |        |        |        |
| Borough I | Dark Purple | Red         | Green             | Orange      | Dark Purple | Red         | Green             | Orange      | Red         | Green       | Orange      | Red         | Green       | Orange      |        |        |        |        |        |
| Borough J | Dark Purple | Red         | Green             | Orange      | Dark Purple | Red         | Light Blue (WLDT) | Orange      | Dark Purple | Red         | Green       | Yellow      | Orange      | Dark Purple | Yellow | Orange |        |        |        |
| Borough K | Dark Purple | Red         | Green             | Light Green | Orange      | Red         | Green             | Light Green | Orange      | Green       | Light Green | Yellow      | Orange      | Red         | Green  | Yellow | Orange |        |        |
| Borough L | Dark Purple | Red         | Green             | Light Green | Orange      | Dark Purple | Red               | Orange      | Dark Purple | Orange      | Red         | Yellow      | Orange      |             |        |        |        |        |        |
| Borough M | Dark Purple | Red         | Light Blue (WLDT) | Orange      | Dark Purple | Red         | Orange            | Dark Purple | Yellow      | Orange      | Dark Purple | Green       | Yellow      |             |        |        |        |        |        |
| Borough N | Dark Purple | Red         | Dark Purple       | Red         | Light Green | Orange      | Dark Purple       | Red         | Light Green | Orange      | Dark Purple | Red         | Green       | Orange      |        |        |        |        |        |
| Borough O | Dark Purple | Red         | Dark Purple       | Red         | Green       | Dark Purple | Red               | Green       | Orange      | Red         | Orange      |             |             |             |        |        |        |        |        |
| Borough P | Dark Purple | Red         | Orange            | Dark Purple | Red         | Green       | Orange            | Dark Purple | Red         | Yellow      | Orange      | Green       | Yellow      | Orange      |        |        |        |        |        |
| Borough Q | Dark Purple | Red         | Orange            | Dark Purple | Red         | Orange      | Dark Purple       | Red         | Green       | Orange      | Red         | Orange      |             |             |        |        |        |        |        |
| Borough R | Red         | Light Green | Orange            | Dark Purple | Red         | Light Green | Orange            | Dark Purple | Red         | Light Green | Yellow      | Orange      | Dark Purple | Red         | Orange |        |        |        |        |
| Borough S | Dark Purple | Red         | Orange            | Dark Purple | Red         | Green       | Light Green       | Orange      | Dark Purple | Red         | Green       | Light Green | Yellow      | Orange      | Red    | Green  | Yellow | Yellow | Orange |
| Borough T | Dark Purple | Red         | Green             | Light Green | Orange      | Dark Purple | Red               | Green       | Light Green | Orange      | Red         | Green       | Light Green | Orange      | Red    | Green  | Orange |        |        |
