# Supplementary material for: Well London Phase-1: results among adults of a cluster-randomised trial of a community engagement approach to improving health behaviours and mental well-being in deprived inner-city neighbourhoods
Source: PubMed Central journal article supplement — J Epidemiol Community Health. 2014 Jan 31;68(7):606–14. doi: 10.1136/jech-2013-202505 (PMC4112422; doi:10.1136/jech-2013-202505), 2014-01-31
Supplement: jech-2013-202505-s3.pdf [file jech-2013-202505-s3.pdf]

### Supplementary File 3: Description of primary and secondary outcome variables

| Outcome type | Outcome                            | Indicator                                                                                                                                                                                                           | Measurement tool                                                                                                                                                                                                                                                    | Data collection        | Baseline adjustment variable                                                                                                                                                         |
|--------------|------------------------------------|---------------------------------------------------------------------------------------------------------------------------------------------------------------------------------------------------------------------|---------------------------------------------------------------------------------------------------------------------------------------------------------------------------------------------------------------------------------------------------------------------|------------------------|--------------------------------------------------------------------------------------------------------------------------------------------------------------------------------------|
| Primary      | Healthy eating                     | Binary – consumption of 5 or more portions of fruit and vegetables per day (“five-a-day”)                                                                                                                           | Food frequency questionnaire adapted from the Health Survey for England                                                                                                                                                                                             | Adult household survey | Proportion meeting five-a-day                                                                                                                                                        |
| Primary      | Healthy physical activity          | Binary – doing five or more sessions of moderate intensity physical activity per week lasting at least 30 mins (“five-a-week”)                                                                                      | International Physical Activity Questionnaire                                                                                                                                                                                                                       | Adult household survey | Proportion meeting five-a-week                                                                                                                                                       |
| Primary      | Mental health – negative           | Binary – score above threshold for normal mental health                                                                                                                                                             | 12 item General Health Questionnaire                                                                                                                                                                                                                                | Adult household survey | Hope Scale score[42]; proportion reporting feeling anxious/depressed in Euroqol 5D[43]; proportion consulting general practitioner for mental health problems in previous 12 months. |
| Primary      | Mental health – positive wellbeing | Continuous - score                                                                                                                                                                                                  | Warwick-Edinburgh Mental Wellbeing Scale                                                                                                                                                                                                                            | Adult household survey | Hope Scale score[42]; proportion reporting feeling anxious/depressed in Euroqol 5D[43]; proportion consulting general practitioner for mental health problems in previous 12 months. |
| Secondary    | Unhealthy eating                   | Continuous – score comprised of mean Likert scale points for frequency of consumption of: fried foods; savoury snacks (crisps, salted nuts); cakes and puddings; sweets and chocolates; sugar sweetened soft drinks | Food frequency questionnaire adapted from the Health Survey for England<br><br>Scale points:<br><i>6 or more times per week (5)</i><br><i>3-5 times per week(4)</i><br><i>1-2 times per week(3)</i><br><i>Less than once a week(2)</i><br><i>Rarely or never(1)</i> | Adult household survey | Mean frequency of eating takeaway foods                                                                                                                                              |
| Secondary    | Healthy eating                     | Continuous – number of portions of fruit and vegetables per day                                                                                                                                                     | Food frequency questionnaire adapted from the Health Survey for England[31]                                                                                                                                                                                         | Adult household survey | Mean portions of fruit and vegetables per day                                                                                                                                        |
| Secondary    | Healthy physical activity          | Binary – doing 60 minutes of moderate intensity                                                                                                                                                                     | International Physical Activity Questionnaire                                                                                                                                                                                                                       | Adult household        | Proportion doing 60 minutes of activity per day                                                                                                                                      |

| Outcome type | Outcome                                                                                                                                       | Indicator                                                                                                                                                                                                                                               | Measurement tool                                                         | Data collection        | Baseline adjustment variable                                                                                                                                                         |
|--------------|-----------------------------------------------------------------------------------------------------------------------------------------------|---------------------------------------------------------------------------------------------------------------------------------------------------------------------------------------------------------------------------------------------------------|--------------------------------------------------------------------------|------------------------|--------------------------------------------------------------------------------------------------------------------------------------------------------------------------------------|
|              |                                                                                                                                               | physical activity per day                                                                                                                                                                                                                               |                                                                          | survey                 |                                                                                                                                                                                      |
| Secondary    | Healthy physical activity                                                                                                                     | Binary – doing 150 minutes of moderate intensity physical activity per week                                                                                                                                                                             | International Physical Activity Questionnaire                            | Adult household survey | Proportion doing 150 minutes of moderate activity per week                                                                                                                           |
| Secondary    | Healthy physical activity                                                                                                                     | Continuous – MET-minutes of activity per week                                                                                                                                                                                                           | International Physical Activity Questionnaire                            | Adult household survey | Mean MET-minutes per week                                                                                                                                                            |
| Secondary    | Mental health – negative                                                                                                                      | Continuous – GHQ12 score                                                                                                                                                                                                                                | 12 item General Health Questionnaire                                     | Adult household survey | Hope Scale score[42]; proportion reporting feeling anxious/depressed in Euroqol 5D[43]; proportion consulting general practitioner for mental health problems in previous 12 months. |
| Secondary    | Social networks:<br>Contact with friends and neighbours                                                                                       | Score indicating relative frequency of contact with friends and neighbours (possible range 0-112)                                                                                                                                                       | ONS social capital harmonised question set                               | Adult household survey | N/A                                                                                                                                                                                  |
| Secondary    | Social support:<br>Help available for practical, financial and emotional problems                                                             | Score indicating number of people who would provide support with practical or financial or emotional problems (possible range 0-6)                                                                                                                      | ONS social capital harmonised question set                               | Adult household survey | N/A                                                                                                                                                                                  |
| Secondary    | Social integration and trust:<br>Residents’ perceptions that neighbours of different backgrounds get along and that neighbours can be trusted | Binary outcomes indicating whether respondents perceive that:<br>- Most people in their neighbourhood can be trusted<br>- People from different backgrounds in the neighbourhood “get on well”<br>- Racial harassment is a problem in the neighbourhood | ONS social capital harmonised question set                               | Adult household survey | N/A                                                                                                                                                                                  |
| Secondary    | Collective efficacy and reciprocity:<br>Residents’ perceptions that neighbours help each other and work together to improve the neighbourhood | Binary outcomes indicating whether respondents perceive that:<br>- People in the neighbourhood pull together to improve it<br>- People in the neighbourhood help each other                                                                             | ONS social capital harmonised question set; Citizenship Survey (England) | Adult household survey | N/A                                                                                                                                                                                  |

| Outcome type | Outcome                                                                                                                                                         | Indicator                                                                                                                                                                                                                                                                                                                 | Measurement tool                           | Data collection                   | Baseline adjustment variable |
|--------------|-----------------------------------------------------------------------------------------------------------------------------------------------------------------|---------------------------------------------------------------------------------------------------------------------------------------------------------------------------------------------------------------------------------------------------------------------------------------------------------------------------|--------------------------------------------|-----------------------------------|------------------------------|
| Secondary    | Civic participation:<br>Participation in volunteering activities; involvement in activism on local issues                                                       | Binary outcomes indicating involvement in:<br>- Volunteering in the last 12 months<br>- Action to solve a problem affecting the local area/community in the last 12 months                                                                                                                                                | ONS social capital harmonised question set | Adult household survey            | N/A                          |
| Secondary    | Antisocial behaviour:<br>Reported by residents                                                                                                                  | Score indicating the number of issues that respondents perceive to be a problem in the local area:<br>- Public drinking/drunkenness<br>- Litter<br>- Graffiti and vandalism<br>- Drug dealing<br>- Teenage gangs<br>- “Troublesome” neighbours<br>(possible range 0-6)                                                    | ONS social capital harmonised question set | Adult household survey            | N/A                          |
| Secondary    | Antisocial behaviour:<br>Coverage across the LSOA of signs of antisocial behaviour and incivilities recorded by fieldworkers completing the environmental audit | Score indicating the intensity of signs of incivilities:<br>Litter/broken glass; graffiti; broken/vandalised facilities; broken windows; unattended dogs; large items dumped in public areas; dog foul; needles/syringes/condoms; empty alcohol cans/bottles; sex paraphernalia (condoms, cars)<br>(possible range 0-100) | -                                          | Neighbourhood environmental audit | Incivilities score           |
| Secondary    | Fear of crime:<br>Residents’ perceptions of neighbourhood safety                                                                                                | Binary outcomes indicating whether respondents feel safe in their neighbourhood:<br>- During the day<br>- At night                                                                                                                                                                                                        | SHARP study                                | Adult household survey            | N/A                          |
| Secondary    | Occurrence of crimes:<br>Annual rate per capita of Police-reported crimes (criminal damage; violence against the person; drugs; robbery & burglary)             | Rate of:<br>- Any crimes<br>- Individual crime categories                                                                                                                                                                                                                                                                 | -                                          | London Metropolitan Police        | Crime rate                   |

Abbreviations: GHQ-12, 12-item General Health Questionnaire; MET-minutes, metabolic equivalent time in minutes; SHARP, Scotland's Housing and Regeneration Project (2002-2008)[32]
