# Supplementary material for: Well London Phase-1: results among adults of a cluster-randomised trial of a community engagement approach to improving health behaviours and mental well-being in deprived inner-city neighbourhoods
Source: PubMed Central journal article supplement — J Epidemiol Community Health. 2014 Jan 31;68(7):606–14. doi: 10.1136/jech-2013-202505 (PMC4112422; doi:10.1136/jech-2013-202505), 2014-01-31
Supplement: jech-2013-202505-s4.pdf [file jech-2013-202505-s4.pdf]

Supplementary File 4: Questionnaire items used to measure social and community processes and outcome measures for the analysis

| Social / Community Process | Indicator                           | Questionnaire items                                                                                                                                                                                    | Response structure                                                                                     | Data collection        | Outcome measure                                                                                                                                                                                                                                                                                                                                |
|----------------------------|-------------------------------------|--------------------------------------------------------------------------------------------------------------------------------------------------------------------------------------------------------|--------------------------------------------------------------------------------------------------------|------------------------|------------------------------------------------------------------------------------------------------------------------------------------------------------------------------------------------------------------------------------------------------------------------------------------------------------------------------------------------|
| Social networks            | Contact with friends and neighbours | How often do you: <ul style="list-style-type: none"> <li>i. Meet up with friends</li> <li>ii. Speak to friends on the phone</li> <li>iii. Write to friends</li> <li>iv. Speak to neighbours</li> </ul> | Most days; once a week or more; once or twice a month; less often than once a month; never; don't know | Adult household survey | <p>Score the responses to indicate approximate number of days per month</p> <p>Most days=28<br/>Once a week or more=12<br/>Once or twice a month=2<br/>Less often than once a month=0.5<br/>Never=0<br/>Don't know = treat as missing</p> <p>Sum the scores across the domains to give a total relative frequency of social contact events</p> |

| Social / Community Process   | Indicator                                       | Questionnaire items                                                                                                                                                                                                                                                                                                          | Response structure                              | Data collection        | Outcome measure                                                                                                                                                                                                                                      |
|------------------------------|-------------------------------------------------|------------------------------------------------------------------------------------------------------------------------------------------------------------------------------------------------------------------------------------------------------------------------------------------------------------------------------|-------------------------------------------------|------------------------|------------------------------------------------------------------------------------------------------------------------------------------------------------------------------------------------------------------------------------------------------|
| Social support               | Help provided                                   | <p>How many people outside your home could you ask for the following kinds of help:</p> <ul style="list-style-type: none"> <li>i. Buy groceries if you are unwell</li> <li>ii. Lend you money for a few days</li> <li>iii. Give advice and support in a crisis</li> </ul>                                                    | None; one or two; more than two; would not ask; | Adult household survey | <p>Score the responses:</p> <p>None=0<br/> One or two = 1<br/> More than two=2<br/> Would not ask = 0<br/> Don't know=missing<br/> Prefers not to say = missing</p> <p>Sum scores across questions to give a social support score with range 0-6</p> |
| Social integration and trust | Residents' perceptions of neighbour interaction | <p>Would you say that:</p> <ul style="list-style-type: none"> <li>a. Most of the people in your neighbourhood can be trusted</li> <li>b. Some can be trusted</li> <li>c. A few can be trusted</li> <li>d. No-one can be trusted</li> <li>e. Just moved here</li> <li>f. Don't know</li> <li>g. Prefers not to say</li> </ul> |                                                 | Adult household survey | <p>Separate binary outcomes:</p> <p>Trust = most or some can be trusted vs. other responses</p>                                                                                                                                                      |

| Social / Community Process | Indicator                                                             | Questionnaire items                                                                                                                      | Response structure                                                                                                                           | Data collection        | Outcome measure                                                                                         |
|----------------------------|-----------------------------------------------------------------------|------------------------------------------------------------------------------------------------------------------------------------------|----------------------------------------------------------------------------------------------------------------------------------------------|------------------------|---------------------------------------------------------------------------------------------------------|
|                            |                                                                       | To what extent do you agree or disagree that this neighbourhood is a place where people from different backgrounds get on well together? | Definitely agree; tend to agree; tend to disagree; definitely disagree; don't know; too few people in the neighbourhood; all same background |                        | Different backgrounds get on = definitely or tend to agree vs. other responses                          |
|                            |                                                                       | How much of a problem is people being attacked or harassed because of their skin colour, ethnic origin or religion?                      | Very big problem; fairly big problem; not a very big problem; it happens but it's not a problem; not a problem at all; don't know            |                        | Racial harassment = very or fairly big problem vs. other responses                                      |
|                            |                                                                       |                                                                                                                                          |                                                                                                                                              |                        |                                                                                                         |
| Collective efficacy        | Residents' perceptions of neighbours mutual help and working together | To what extent do you agree or disagree that people in this neighbourhood pull together to improve the neighbourhood?                    | Definitely agree; tend to agree; tend to disagree; definitely disagree; don't know; nothing needs improving                                  | Adult household survey | Separate binary outcomes:<br><br>People pull together = definitely or tend to agree vs. other responses |
|                            |                                                                       | Is this a neighbourhood in which people do things together and try to help each other, or one in which people mostly go their own way?   | Help each other; go own way; mixture; don't know                                                                                             |                        | Help each other = health each other vs. other responses                                                 |

| Social / Community Process | Indicator                                                                       | Questionnaire items                                                                                                  | Response structure                                                                                                                                                                                                                                                                                                                                                                             | Data collection        | Outcome measure                                        |
|----------------------------|---------------------------------------------------------------------------------|----------------------------------------------------------------------------------------------------------------------|------------------------------------------------------------------------------------------------------------------------------------------------------------------------------------------------------------------------------------------------------------------------------------------------------------------------------------------------------------------------------------------------|------------------------|--------------------------------------------------------|
| Civic participation        | Involvement in volunteering activities; involvement in activism on local issues | During the last 12 months have you given any unpaid help to any groups, clubs or organisations in any of these ways? | Raising or handling money/taking part in a sponsored event; leading the group/member of a committee; organising or helping run an activity or event; visiting people; befriending or mentoring people; giving advice/information/counselling; secretarial/admin/clerical work; providing transport/driving; representing; campaigning; other practical help; any other help; none of the above | Adult household survey | Binary: Involvement in any activity vs. no involvement |

| Social / Community Process | Indicator                                      | Questionnaire items                                                                                                                                                                                                                                                                                              | Response structure                                                                                                                                                                                                                                                                                                                                                                                                                                   | Data collection        | Outcome measure                                                                                                                                                                                                              |
|----------------------------|------------------------------------------------|------------------------------------------------------------------------------------------------------------------------------------------------------------------------------------------------------------------------------------------------------------------------------------------------------------------|------------------------------------------------------------------------------------------------------------------------------------------------------------------------------------------------------------------------------------------------------------------------------------------------------------------------------------------------------------------------------------------------------------------------------------------------------|------------------------|------------------------------------------------------------------------------------------------------------------------------------------------------------------------------------------------------------------------------|
|                            |                                                | In the last 12 months have you taken any of the following actions in an attempt to solve a problem affecting people in your local area?                                                                                                                                                                          | Contacted a local radio/television station or newspaper; contacted the appropriate organisation such as the council; contacted a local councillor or MP; attended a public meeting or neighbourhood forum to discuss local issues; attended a tenants' or local residents' group; attended a protest meeting or joined an action group; helped organise a petition on a local issue; no local problems; none of these; don't know; none of the above |                        | Binary: Taken any action vs. no action                                                                                                                                                                                       |
| Antisocial behaviour       | Residents' perceptions of antisocial behaviour | <p>I am going to read out a list of problems which some people face in their neighbourhood. For each one, please can you tell me how much of a problem it is:</p> <p>How much of a problem are people being drunk or rowdy in public places?</p> <p>How much of a problem is rubbish or litter lying around?</p> | Very big problem; fairly big problem; not a very big problem; it happens but it's not a problem; not a problem at all; don't know                                                                                                                                                                                                                                                                                                                    | Adult household survey | <p>Binary indicator for each question:</p> <p><b>Very or fairly big problem vs. other responses</b></p> <p>Sum binary scores across the questions to give a perceived antisocial behaviour score ranging between 0 and 6</p> |

| Social / Community Process | Indicator                                               | Questionnaire items                                                                                                                                                                                                                                                                                                                                                                          | Response structure                   | Data collection                   | Outcome measure                                                                                                                                                                                                                                              |
|----------------------------|---------------------------------------------------------|----------------------------------------------------------------------------------------------------------------------------------------------------------------------------------------------------------------------------------------------------------------------------------------------------------------------------------------------------------------------------------------------|--------------------------------------|-----------------------------------|--------------------------------------------------------------------------------------------------------------------------------------------------------------------------------------------------------------------------------------------------------------|
|                            |                                                         | How much of a problem are vandalism, graffiti and other deliberate damage to property or vehicles?                                                                                                                                                                                                                                                                                           |                                      |                                   |                                                                                                                                                                                                                                                              |
|                            |                                                         | How much of a problem are people using or dealing drugs?                                                                                                                                                                                                                                                                                                                                     |                                      |                                   |                                                                                                                                                                                                                                                              |
|                            |                                                         | How much of a problem are teenagers hanging around on the street?                                                                                                                                                                                                                                                                                                                            |                                      |                                   |                                                                                                                                                                                                                                                              |
|                            |                                                         | How much of a problem are troublesome neighbours?                                                                                                                                                                                                                                                                                                                                            |                                      |                                   |                                                                                                                                                                                                                                                              |
| Antisocial behaviour       | Signs of antisocial behaviour observed by field workers | <p>When you walked around this segment did you see:</p> <p>Litter of broken glass</p> <p>Graffiti</p> <p>Broken or vandalised facilities</p> <p>Broken windows</p> <p>Unattended dogs</p> <p>Large items dumped in public areas (furniture/cars)</p> <p>Dog foul</p> <p>Needles, syringes or condoms</p> <p>Empty beer cans or alcohol bottles</p> <p>Sex paraphernalia (condoms, cards)</p> | None; little; moderate amount; a lot | Neighbourhood environmental audit | <p>Score none=0, little=1, moderate=2, a lot=3</p> <p>Calculate the mean score for each domain (i.e. litter, graffiti etc.) across the surveyed segments in the LSOA. Sum the domain mean scores for the LSOA and standardise to range between 0 and 100</p> |

| Social / Community Process | Indicator                                      | Questionnaire items                                                                                                                                                                                                 | Response structure                                                 | Data collection        | Outcome measure                                                                        |
|----------------------------|------------------------------------------------|---------------------------------------------------------------------------------------------------------------------------------------------------------------------------------------------------------------------|--------------------------------------------------------------------|------------------------|----------------------------------------------------------------------------------------|
| Fear of crime              | Residents' perceptions of neighbourhood safety | <p>How safe do you feel generally when you are walking outside alone in this neighbourhood during the daytime?</p> <p>How safe do you feel when you are walking outside in this neighbourhood alone after dark?</p> | Very safe; fairly safe; a bit unsafe; very unsafe; never out alone | Adult household survey | <p>Separate binary outcomes:</p> <p><b>Very or fairly safe vs. other responses</b></p> |
