# Supplementary material for: Well London Phase-1: results among adults of a cluster-randomised trial of a community engagement approach to improving health behaviours and mental well-being in deprived inner-city neighbourhoods
Source: PubMed Central journal article supplement — J Epidemiol Community Health. 2014 Jan 31;68(7):606–14. doi: 10.1136/jech-2013-202505 (PMC4112422; doi:10.1136/jech-2013-202505), 2014-01-31
Supplement: jech-2013-202505-s7.pdf [file jech-2013-202505-s7.pdf]

Supplementary File 7: Missing data in primary and secondary health outcomes and sociodemographic variables in the *Well London* cluster randomised trial follow-up survey (n=3881)

| Variable                                                      | Percent responses missing (n=3881) |
|---------------------------------------------------------------|------------------------------------|
| Age                                                           | 0                                  |
| Gender                                                        | 0                                  |
| Ethnicity                                                     | 0.4                                |
| Employment status                                             | 1.9                                |
| Educational achievement                                       | 1.0                                |
| Healthy eating (portions of fruit and vegetables per day)     | 4.0                                |
| Unhealthy eating score                                        | 2.6                                |
| Physical activity (MET minutes per week)                      | 0.1                                |
| Mental health                                                 |                                    |
| Warwick Edinburgh Mental Wellbeing Scale                      | 2.1                                |
| Social networks score                                         | 2.3                                |
| Social support score                                          | 1.6                                |
| Social integration                                            |                                    |
| Some or most people in neighbourhood can be trusted           | -                                  |
| People from different backgrounds in the neighbourhood get on | -                                  |
| Racial harassment is a problem in the neighbourhood           | -                                  |
| Collective efficacy                                           |                                    |

|                                                                        |   |
|------------------------------------------------------------------------|---|
| People in the neighbourhood pull together to improve it                | - |
| People in the neighbourhood help each other and do things together     | - |
| Taken any action to solve problems in the local area in past 12 months | - |
| Volunteering – any activity in last 12 months                          | - |
| Antisocial behaviour –resident perceptions –score                      | - |
| Fear of crime                                                          |   |
| Feel safe in the neighbourhood during the day                          | - |
| Feel safe in the neighbourhood at night                                | - |

---
