# Supplementary material for: Well London Phase-1: results among adults of a cluster-randomised trial of a community engagement approach to improving health behaviours and mental well-being in deprived inner-city neighbourhoods
Source: PubMed Central journal article supplement — J Epidemiol Community Health. 2014 Jan 31;68(7):606–14. doi: 10.1136/jech-2013-202505 (PMC4112422; doi:10.1136/jech-2013-202505), 2014-01-31
Supplement: jech-2013-202505-s8.pdf [file jech-2013-202505-s8.pdf]

Supplementary File 8: Subgroup-specific effect estimates for primary health outcomes and test of interaction between subgroup variable and intervention status (Overall P value)

Supplementary Table 1: Age specific effect estimates for health outcomes

|                                                                         | Summary statistics                                                  |                          | Effect estimates                                                           |                |                      |                | Sample size |              | Overall<br><i>P</i><br>value |
|-------------------------------------------------------------------------|---------------------------------------------------------------------|--------------------------|----------------------------------------------------------------------------|----------------|----------------------|----------------|-------------|--------------|------------------------------|
|                                                                         | (mean of continuous variables,<br>prevalence of binary<br>outcomes) |                          | Rate ratio for binary outcomes, mean difference for<br>continuous outcomes |                |                      |                |             |              |                              |
|                                                                         | Control<br>(95% CI)                                                 | Intervention<br>(95% CI) | Unadjusted<br>(95% CI)                                                     | <i>P</i> value | Adjusted<br>(95% CI) | <i>P</i> value | Control     | Intervention |                              |
| <i>Primary health outcomes</i>                                          |                                                                     |                          |                                                                            |                |                      |                |             |              |                              |
| Healthy eating – meeting five-a-day (fruit and vegetable portions)<br>% |                                                                     |                          |                                                                            |                |                      |                |             |              | 1.0                          |
| 16-24 years                                                             | 47.4<br>(39.3, 55.6)                                                | 52.2<br>(43.2, 61.2)     | 1.1<br>(0.8, 1.5)                                                          | 0.5            | 1.1<br>(0.8, 1.5)    | 0.5            | 392         | 412          |                              |
| 25-34 years                                                             | 58.5<br>(51.5, 65.5)                                                | 58.1<br>(52.3, 64.0)     | 1.0<br>(0.9, 1.2)                                                          | 0.9            | 1.0<br>(0.9, 1.2)    | 1.0            | 475         | 466          |                              |
| 35-44 years                                                             | 53.3<br>(46.3, 60.3)                                                | 56.1<br>(49.1, 63.2)     | 1.0<br>(0.8, 1.2)                                                          | 1.0            | 1.0<br>(0.8, 1.2)    | 1.0            | 377         | 401          |                              |
| 45-54 years                                                             | 53.0<br>(44.1, 61.9)                                                | 53.9<br>(46.4, 61.4)     | 1.1<br>(0.8, 1.4)                                                          | 0.6            | 1.1<br>(0.8, 1.4)    | 0.5            | 281         | 256          |                              |

|                                                                                    | Summary statistics<br>(mean of continuous variables,<br>prevalence of binary<br>outcomes) |                          | Effect estimates<br>Rate ratio for binary outcomes, mean difference for<br>continuous outcomes |                |                      |                | Sample size |              | Overall<br><i>P</i><br>value |
|------------------------------------------------------------------------------------|-------------------------------------------------------------------------------------------|--------------------------|------------------------------------------------------------------------------------------------|----------------|----------------------|----------------|-------------|--------------|------------------------------|
|                                                                                    | Control<br>(95% CI)                                                                       | Intervention<br>(95% CI) | Unadjusted<br>(95% CI)                                                                         | <i>P</i> value | Adjusted<br>(95% CI) | <i>P</i> value | Control     | Intervention |                              |
| 55-64 years                                                                        | 53.6<br>(43.8, 63.4)                                                                      | 63.6<br>(53.1, 74.2)     | 1.1<br>(0.9, 1.4)                                                                              | 0.4            | 1.1<br>(0.9, 1.3)    | 0.3            | 153         | 121          | 0.9                          |
| 65+years                                                                           | 53.7<br>(44.0, 63.5)                                                                      | 52.2<br>(43.2, 61.3)     | 1.0<br>(0.8, 1.4)                                                                              | 0.8            | 1.1<br>(0.8, 1.4)    | 0.7            | 147         | 136          |                              |
| Physical activity – meeting 5x30<br>mins moderate intensity activity<br>per week % |                                                                                           |                          |                                                                                                |                |                      |                |             |              |                              |
| 16-24 years                                                                        | 74.6<br>(66.6, 82.5)                                                                      | 75.9<br>(71.1, 80.7)     | 1.0<br>(0.9, 1.2)                                                                              | 0.5            | 1.0<br>(0.9, 1.2)    | 0.6            | 405         | 456          |                              |
| 25-34 years                                                                        | 67.2<br>(59.1, 75.3)                                                                      | 73.0<br>(66.5, 79.6)     | 1.1<br>(0.9, 1.3)                                                                              | 0.5            | 1.1<br>(0.9, 1.3)    | 0.5            | 488         | 482          |                              |
| 35-44 years                                                                        | 69.8<br>(61.4, 78.3)                                                                      | 69.8<br>(62., 76.8)      | 1.0<br>(0.8, 1.2)                                                                              | 0.9            | 1.0<br>(0.8, 1.1)    | 0.5            | 388         | 411          | 0.9                          |
| 45-54 years                                                                        | 65.5<br>(55.9, 75.1)                                                                      | 60.9<br>(51.8, 69.9)     | 1.0<br>(0.7, 1.3)                                                                              | 0.8            | 0.9<br>(0.7, 1.2)    | 0.7            | 287         | 271          |                              |

|                                      | Summary statistics<br>(mean of continuous variables,<br>prevalence of binary<br>outcomes) |                          | Effect estimates<br>Rate ratio for binary outcomes, mean difference for<br>continuous outcomes |                |                      |                | Sample size |              | Overall<br><i>P</i><br>value |
|--------------------------------------|-------------------------------------------------------------------------------------------|--------------------------|------------------------------------------------------------------------------------------------|----------------|----------------------|----------------|-------------|--------------|------------------------------|
|                                      | Control<br>(95% CI)                                                                       | Intervention<br>(95% CI) | Unadjusted<br>(95% CI)                                                                         | <i>P</i> value | Adjusted<br>(95% CI) | <i>P</i> value | Control     | Intervention |                              |
| 55-64 years                          | 58.3<br>(50.0, 67.1)                                                                      | 58.7<br>(48.4, 69.1)     | 1.0<br>(0.8, 1.3)                                                                              | 0.9            | 1.0<br>(0.8, 1.3)    | 1.0            | 156         | 126          |                              |
| 65+years                             | 44.7<br>(31.3, 58.0)                                                                      | 46.4<br>(37.5, 55.2)     | 1.1<br>(0.8, 1.6)                                                                              | 0.5            | 1.2<br>(0.9, 1.6)    | 0.2            | 150         | 138          |                              |
| Mental health                        |                                                                                           |                          |                                                                                                |                |                      |                |             |              |                              |
| Abnormal/borderline<br>GHQ12 score % |                                                                                           |                          |                                                                                                |                |                      |                |             |              | 0.9                          |
| 16-24 years                          | 4.2<br>(2.1, 6.3)                                                                         | 5.3<br>(2.4, 8.2)        | 1.0<br>(0.7, 1.3)                                                                              | 1.0            | 1.1<br>(0.6, 1.3)    | 0.7            | 405         | 452          |                              |
| 25-34 years                          | 5.8<br>(4.0, 7.5)                                                                         | 5.4<br>(2.8, 8.1)        | 1.0<br>(0.7, 1.5)                                                                              | 0.9            | 1.0<br>(0.7, 1.3)    | 0.9            | 485         | 479          |                              |
| 35-44 years                          | 6.0<br>(3.4, 8.6)                                                                         | 6.8<br>(4.0, 9.7)        | 1.1<br>(0.8, 1.6)                                                                              | 0.7            | 1.0<br>(0.6, 1.5)    | 1.0            | 384         | 410          |                              |
| 45-54 years                          | 7.1                                                                                       | 9.6                      | 0.9                                                                                            | 0.7            | 1.1                  | 0.7            | 283         | 271          |                              |

|                                                            | Summary statistics                                                  |                          | Effect estimates                                                           |                |                        |                | Sample size |              | Overall<br><i>P</i><br>value |
|------------------------------------------------------------|---------------------------------------------------------------------|--------------------------|----------------------------------------------------------------------------|----------------|------------------------|----------------|-------------|--------------|------------------------------|
|                                                            | (mean of continuous variables,<br>prevalence of binary<br>outcomes) |                          | Rate ratio for binary outcomes, mean difference for<br>continuous outcomes |                |                        |                |             |              |                              |
|                                                            | Control<br>(95% CI)                                                 | Intervention<br>(95% CI) | Unadjusted<br>(95% CI)                                                     | <i>P</i> value | Adjusted<br>(95% CI)   | <i>P</i> value | Control     | Intervention |                              |
|                                                            | (3.7, 10.4)                                                         | (6.1, 13.1)              | (0.7, 1.2)                                                                 |                | (0.8, 1.5)             |                |             |              |                              |
| 55-64 years                                                | 9.0<br>(3.3, 14.6)                                                  | 11.3<br>(5.2, 17.6)      | 1.7<br>(1.0, 2.7)                                                          | 0.4            | 1.1<br>(0.8, 1.5)      | 0.8            | 156         | 123          |                              |
| 65+years                                                   | 8.2<br>(1.4, 14.9)                                                  | 11.7<br>(5.5, 17.9)      | 0.8<br>(0.4, 1.5)                                                          | 0.8            | 0.4<br>(0.2, 0.7)      | 0.3            | 147         | 137          |                              |
| Warwick Edinburgh<br>Mental Wellbeing Scale-<br>mean score |                                                                     |                          |                                                                            |                |                        |                |             |              | 0.3                          |
| 16-24 years                                                | 61.0<br>(58.9, 63.1)                                                | 59.8<br>(57.5, 62.3)     | -1.48<br>(-4.31, 1.36)                                                     | 0.3            | -1.96<br>(-4.07, 0.14) | 0.06           | 399         | 435          |                              |
| 25-34 years                                                | 59.9<br>(57.8, 62.0)                                                | 59.1<br>(56.7, 61.6)     | -0.93<br>(-4.27, 2.41)                                                     | 0.6            | -1.58<br>(-3.94, 0.78) | 0.2            | 487         | 475          |                              |
| 35-44 years                                                | 59.8<br>(58.0, 61.7)                                                | 58.5<br>(56.4, 60.7)     | -1.41<br>(-4.62, 1.80)                                                     | 0.4            | -1.24<br>(-3.94, 1.46) | 0.3            | 385         | 405          |                              |

|             | Summary statistics                                                  |                              | Effect estimates                                                           |                |                          |                | Sample size |              | Overall<br><i>P</i><br>value |
|-------------|---------------------------------------------------------------------|------------------------------|----------------------------------------------------------------------------|----------------|--------------------------|----------------|-------------|--------------|------------------------------|
|             | (mean of continuous variables,<br>prevalence of binary<br>outcomes) |                              | Rate ratio for binary outcomes, mean difference for<br>continuous outcomes |                |                          |                |             |              |                              |
|             | Control<br><br>(95% CI)                                             | Intervention<br><br>(95% CI) | Unadjusted<br><br>(95% CI)                                                 | <i>P</i> value | Adjusted<br><br>(95% CI) | <i>P</i> value | Control     | Intervention |                              |
| 45-54 years | 59.2                                                                | 57.4                         | -1.81                                                                      | 0.2            | -1.95                    | 0.09           | 281         | 265          |                              |
|             | (57.3, 61.2)                                                        | (55.5, 59.2)                 | (-4.49)                                                                    |                | (-4.34, 0.44)            |                |             |              |                              |
| 55-64 years | 60.6                                                                | 57.5                         | -3.68                                                                      | 0.03           | -2.83                    | 0.1            | 152         | 122          |                              |
|             | (57.8, 63.5)                                                        | (55.6, 59.4)                 | (-6.96, -0.41)                                                             |                | (-6.31, 0.65)            |                |             |              |                              |
| 65+years    | 60.4                                                                | 57.2                         | -2.71                                                                      | 0.05           | -2.16                    | 0.1            | 148         | 133          |                              |
|             | (57.7, 63.1)                                                        | (54.6, 59.9)                 | (-5.43, 0.00)                                                              |                | (-5.03, -0.71)           |                |             |              |                              |

Supplementary Table 2: Gender specific effect estimates for health outcomes

|                                                                              | Summary statistics                                                  |                          | Effect estimates                                                           |                |                      |                | Sample size |              | Overall<br><i>P</i><br>value |
|------------------------------------------------------------------------------|---------------------------------------------------------------------|--------------------------|----------------------------------------------------------------------------|----------------|----------------------|----------------|-------------|--------------|------------------------------|
|                                                                              | (mean of continuous variables,<br>prevalence of binary<br>outcomes) |                          | Rate ratio for binary outcomes, mean difference for<br>continuous outcomes |                |                      |                |             |              |                              |
|                                                                              | Control<br>(95% CI)                                                 | Intervention<br>(95% CI) | Unadjusted<br>(95% CI)                                                     | <i>P</i> value | Adjusted<br>(95% CI) | <i>P</i> value | Control     | Intervention |                              |
| <i>Primary health outcomes</i>                                               |                                                                     |                          |                                                                            |                |                      |                |             |              |                              |
| Healthy eating – meeting five-a-day (fruit and vegetable portions)<br>%      |                                                                     |                          |                                                                            |                |                      |                |             |              | 0.9                          |
| Male                                                                         | 53.1<br>(46.5, 59.8)                                                | 55.1<br>(48.3, 61.9)     | 1.0<br>(0.9, 1.2)                                                          | 0.7            | 1.1<br>(0.9, 1.2)    | 0.5            | 800         | 757          |                              |
| Female                                                                       | 53.7<br>(47.5, 59.8)                                                | 56.0<br>(51.2, 60.9)     | 1.1<br>(0.9, 1.2)                                                          | 0.5            | 1.1<br>(0.9, 1.2)    | 0.4            | 1025        | 1035         |                              |
| Physical activity – meeting 5x30 mins moderate intensity activity per week % |                                                                     |                          |                                                                            |                |                      |                |             |              | 0.9                          |
| Male                                                                         | 70.2<br>(63.3, 77.0)                                                | 71.6<br>(65.2, 77.9)     | 1.0<br>(0.9, 1.2)                                                          | 0.9            | 1.0<br>(0.9, 1.2)    | 1.0            | 821         | 802          |                              |

|                                                            | Summary statistics<br>(mean of continuous variables,<br>prevalence of binary<br>outcomes) |                          | Effect estimates<br>Rate ratio for binary outcomes, mean difference for<br>continuous outcomes |                |                       |                | Sample size |              | Overall<br><i>P</i><br>value |
|------------------------------------------------------------|-------------------------------------------------------------------------------------------|--------------------------|------------------------------------------------------------------------------------------------|----------------|-----------------------|----------------|-------------|--------------|------------------------------|
|                                                            | Control<br>(95% CI)                                                                       | Intervention<br>(95% CI) | Unadjusted<br>(95% CI)                                                                         | <i>P</i> value | Adjusted<br>(95% CI)  | <i>P</i> value | Control     | Intervention |                              |
| Female                                                     | 63.7<br>(55.3, 72.2)                                                                      | 66.0<br>(60.9, 71.1)     | 1.1<br>(0.9, 1.3)                                                                              | 0.5            | 1.0<br>(0.9, 1.2)     | 0.8            | 1053        | 1082         |                              |
| Mental health                                              |                                                                                           |                          |                                                                                                |                |                       |                |             |              |                              |
| Abnormal/borderline<br>GHQ12 score %                       |                                                                                           |                          |                                                                                                |                |                       |                |             |              | 0.5                          |
| Male                                                       | 5.0<br>(3.1, 6.9)                                                                         | 6.9<br>(4.5, 9.4)        | 1.3<br>(0.8, 2.0)                                                                              | 0.4            | 1.2<br>(0.7, 1.9)     | 0.5            | 816         | 794          |                              |
| Female                                                     | 7.0<br>(4.9, 9.1)                                                                         | 7.3<br>(5.6, 9.1)        | 1.1<br>(0.8, 1.5)                                                                              | 0.5            | 1.0<br>(0.8, 1.3)     | 0.9            | 1044        | 1078         |                              |
| Warwick Edinburgh<br>Mental Wellbeing Scale-<br>mean score |                                                                                           |                          |                                                                                                |                |                       |                |             |              | 0.6                          |
| Male                                                       | 60.4<br>(58.8, 62.1)                                                                      | 59.3<br>(57.1, 61.5)     | -1.56<br>(-4.42, 1.30)                                                                         | 0.3            | -1.87<br>(-4.28, 0.6) | 0.1            | 809         | 782          |                              |
| Female                                                     | 59.9                                                                                      | 58.2                     | -1.76                                                                                          | 0.1            | -1.81                 | 0.08           | 1043        | 1053         |                              |

| Summary statistics                                                  |              | Effect estimates                                                           |                |               |                | Sample size |              | Overall<br><i>P</i><br>value |
|---------------------------------------------------------------------|--------------|----------------------------------------------------------------------------|----------------|---------------|----------------|-------------|--------------|------------------------------|
| (mean of continuous variables,<br>prevalence of binary<br>outcomes) |              | Rate ratio for binary outcomes, mean difference for<br>continuous outcomes |                |               |                |             |              |                              |
| Control                                                             | Intervention | Unadjusted                                                                 | <i>P</i> value | Adjusted      | <i>P</i> value | Control     | Intervention |                              |
| (95% CI)                                                            | (95% CI)     | (95% CI)                                                                   |                | (95% CI)      |                |             |              |                              |
| (57.9, 61.9)                                                        | (56.4, 59.9) | (-4.09, 0.57)                                                              |                | (-3.93, 0.30) |                |             |              |                              |

Supplementary Table 3: Ethnicity specific effect estimates for health outcomes

|                                                                      | Summary statistics                                            |                          | Effect estimates                                                        |                |                      |                | Sample size |              | Overall <i>P</i> value |
|----------------------------------------------------------------------|---------------------------------------------------------------|--------------------------|-------------------------------------------------------------------------|----------------|----------------------|----------------|-------------|--------------|------------------------|
|                                                                      | (mean of continuous variables, prevalence of binary outcomes) |                          | Rate ratio for binary outcomes, mean difference for continuous outcomes |                |                      |                |             |              |                        |
|                                                                      | Control<br>(95% CI)                                           | Intervention<br>(95% CI) | Unadjusted<br>(95% CI)                                                  | <i>P</i> value | Adjusted<br>(95% CI) | <i>P</i> value | Control     | Intervention |                        |
| <i>Primary health outcomes</i>                                       |                                                               |                          |                                                                         |                |                      |                |             |              |                        |
| Healthy eating – meeting five-a-day (fruit and vegetable portions) % |                                                               |                          |                                                                         |                |                      |                |             |              | 0.9                    |
| White British                                                        | 46.2<br>(36.3, 56.1)                                          | 50.6<br>(43.5, 57.8)     | 1.2<br>(1.0, 1.4)                                                       | 0.09           | 1.2<br>(1.0, 1.4)    | 0.1            | 420         | 462          |                        |
| White other                                                          | 57.0<br>(45.5, 68.4)                                          | 64.5<br>(55.2, 73.8)     | 1.0<br>(0.8, 1.3)                                                       | 0.8            | 1.0<br>(0.8, 1.3)    | 0.8            | 237         | 310          |                        |
| Black Caribbean                                                      | 50.7<br>(42.0, 59.5)                                          | 48.9<br>(40.8, 57.0)     | 1.0<br>(0.8, 1.2)                                                       | 0.8            | 0.9<br>(0.8, 1.1)    | 0.5            | 203         | 186          |                        |
| Black African                                                        | 50.9<br>(41.6, 60.1)                                          | 52.1<br>(43.8, 60.4)     | 1.0<br>(0.7, 1.4)                                                       | 0.8            | 0.9<br>(0.7, 1.3)    | 0.7            | 403         | 382          |                        |
| Indian/Pakistani/Bangladeshi                                         | 62.8<br>(50.8, 74.9)                                          | 59.6<br>(51.5, 67.8)     | 1.1<br>(0.9, 1.4)                                                       | 0.3            | 1.2<br>(0.9, 1.5)    | 0.3            | 363         | 208          |                        |

|                                                                              | Summary statistics<br>(mean of continuous variables, prevalence of binary outcomes) |                          | Effect estimates<br>Rate ratio for binary outcomes, mean difference for continuous outcomes |                |                      |                | Sample size |              | Overall <i>P</i> value |
|------------------------------------------------------------------------------|-------------------------------------------------------------------------------------|--------------------------|---------------------------------------------------------------------------------------------|----------------|----------------------|----------------|-------------|--------------|------------------------|
|                                                                              | Control<br>(95% CI)                                                                 | Intervention<br>(95% CI) | Unadjusted<br>(95% CI)                                                                      | <i>P</i> value | Adjusted<br>(95% CI) | <i>P</i> value | Control     | Intervention |                        |
| Other/Mixed                                                                  | 55.3<br>(46.5, 64.1)                                                                | 61.1<br>(54.1, 68.1)     | 1.0<br>(0.8, 1.3)                                                                           | 0.8            | 1.0<br>(0.8, 1.3)    | 0.6            | 199         | 244          | 0.8                    |
| Physical activity – meeting 5x30 mins moderate intensity activity per week % |                                                                                     |                          |                                                                                             |                |                      |                |             |              |                        |
| White British                                                                | 70.5<br>(63.5, 77.6)                                                                | 67.1<br>(62.7, 71.6)     | 1.0<br>(0.9, 1.1)                                                                           | 0.9            | 1.0<br>(0.9, 1.1)    | 0.8            | 431         | 484          |                        |
| White other                                                                  | 71.8<br>(64.3, 79.3)                                                                | 38.2<br>(26.7, 49.6)     | 1.1<br>(0.9, 1.4)                                                                           | 0.4            | 1.1<br>(0.9, 1.4)    | 0.4            | 330         | 249          |                        |
| Black Caribbean                                                              | 69.3<br>(59.8, 78.7)                                                                | 69.9<br>(60.2, 79.6)     | 1.0<br>(0.8, 1.2)                                                                           | 0.8            | 0.9<br>(0.7, 1.2)    | 0.5            | 205         | 196          |                        |
| Black African                                                                | 66.7<br>(57.8, 75.7)                                                                | 70.8<br>(62.9, 78.7)     | 1.0<br>(0.8, 1.2)                                                                           | 0.9            | 1.0<br>(0.8, 1.2)    | 1.0            | 418         | 397          |                        |
| Indian/Pakistani/Bangladeshi                                                 | 55.4<br>(42.6, 68.2)                                                                | 61.5<br>(51.4, 71.7)     | 1.1<br>(0.8, 1.5)                                                                           | 0.6            | 1.0<br>(0.8, 1.4)    | 0.8            | 368         | 221          |                        |

|                                   | Summary statistics<br>(mean of continuous variables, prevalence of binary outcomes) |                          | Effect estimates<br>Rate ratio for binary outcomes, mean difference for continuous outcomes |                |                      |                | Sample size |              | Overall <i>P</i> value |
|-----------------------------------|-------------------------------------------------------------------------------------|--------------------------|---------------------------------------------------------------------------------------------|----------------|----------------------|----------------|-------------|--------------|------------------------|
|                                   | Control<br>(95% CI)                                                                 | Intervention<br>(95% CI) | Unadjusted<br>(95% CI)                                                                      | <i>P</i> value | Adjusted<br>(95% CI) | <i>P</i> value | Control     | Intervention |                        |
| Other/Mixed                       | 65.0<br>(53.4, 76.7)                                                                | 67.2<br>(58.2, 76.1)     | 1.1<br>(0.8, 1.5)                                                                           | 0.7            | 1.1<br>(0.8, 1.5)    | 0.7            | 203         | 256          |                        |
| Mental health                     |                                                                                     |                          |                                                                                             |                |                      |                |             |              |                        |
| Abnormal/borderline GHQ12 score % |                                                                                     |                          |                                                                                             |                |                      |                |             |              | 0.4                    |
| White British                     | 6.8<br>(3.3, 10.3)                                                                  | 10.0<br>(6.1, 13.9)      | 1.0<br>(0.6, 1.7)                                                                           | 0.9            | 1.2<br>(0.7, 1.8)    | 0.6            | 426         | 480          |                        |
| White other                       | 7.8<br>(3.9, 11.7)                                                                  | 6.1<br>(2.0, 10.2)       | 0.9<br>(0.6, 1.3)                                                                           | 0.8            | 1.0<br>(0.6, 1.5)    | 0.9            | 244         | 328          |                        |
| Black Caribbean                   | 7.8<br>(4.6, 11.0)                                                                  | 6.7<br>(2.9, 10.4)       | 1.0<br>(0.7, 1.5)                                                                           | 1.0            | 0.9<br>(0.6, 1.3)    | 0.7            | 205         | 195          |                        |
| Black African                     | 4.1<br>(1.6, 6.6)                                                                   | 3.5<br>(0.9, 6.2)        | 1.2<br>(0.8, 1.7)                                                                           | 0.7            | 1.1<br>(0.9, 1.4)    | 0.6            | 413         | 396          |                        |

|                                                      | Summary statistics<br>(mean of continuous variables, prevalence of binary outcomes) |                          | Effect estimates<br>Rate ratio for binary outcomes, mean difference for continuous outcomes |                |                      |                | Sample size |              | Overall <i>P</i> value |
|------------------------------------------------------|-------------------------------------------------------------------------------------|--------------------------|---------------------------------------------------------------------------------------------|----------------|----------------------|----------------|-------------|--------------|------------------------|
|                                                      | Control<br>(95% CI)                                                                 | Intervention<br>(95% CI) | Unadjusted<br>(95% CI)                                                                      | <i>P</i> value | Adjusted<br>(95% CI) | <i>P</i> value | Control     | Intervention |                        |
| Indian/Pakistani/Bangladeshi                         | 4.3<br>(1.7, 6.9)                                                                   | 6.8<br>(2.4, 11.3)       | 4.6<br>(0.5, 41.3)                                                                          | 0.1            | 3.8<br>(2.6, 5.5)    | 0.05           | 369         | 219          | 0.4                    |
| Other/Mixed                                          | 8.4<br>(5.0, 11.7)                                                                  | 9.4<br>(4.8, 14.1)       | 1.0<br>(0.8, 1.2)                                                                           | 0.9            | 1.4<br>(1.0, 2.0)    | 0.3            | 203         | 254          |                        |
| Warwick Edinburgh Mental Wellbeing Scale- mean score |                                                                                     |                          |                                                                                             |                |                      |                |             |              |                        |
| White British                                        | 59.3<br>(57.8, 60.7)                                                                | 57.2<br>(55.4, 59.1)     | -0.2<br>(-0.3, 0.01)                                                                        | 0.07           | -2.4<br>(-4.5, -0.3) | 0.03           | 427         | 473          |                        |
| White other                                          | 60.9<br>(59.5, 62.3)                                                                | 58.6<br>(55.7, 61.4)     | -1.5<br>(-5.0, 2.0)                                                                         | 0.4            | -2.0<br>(-4.6, 0.5)  | 0.1            | 248         | 318          |                        |
| Black Caribbean                                      | 57.6<br>(54.2, 60.9)                                                                | 59.6<br>(57.0, 62.1)     | 0.5<br>(-3.2, 4.1)                                                                          | 0.8            | -0.3<br>(-4.0, 3.4)  | 0.9            | 200         | 187          |                        |
| Black African                                        | 59.8<br>(57.0, 62.6)                                                                | 59.1<br>(56.3, 61.8)     | -1.2<br>(-4.2, 1.7)                                                                         | 0.4            | -1.5<br>(-4.0, 1.1)  | 0.2            | 410         | 391          |                        |

|                              | Summary statistics<br>(mean of continuous variables, prevalence of binary outcomes) |                          | Effect estimates<br>Rate ratio for binary outcomes, mean difference for continuous outcomes |                |                      |                | Sample size |              | Overall <i>P</i> value |
|------------------------------|-------------------------------------------------------------------------------------|--------------------------|---------------------------------------------------------------------------------------------|----------------|----------------------|----------------|-------------|--------------|------------------------|
|                              | Control<br>(95% CI)                                                                 | Intervention<br>(95% CI) | Unadjusted<br>(95% CI)                                                                      | <i>P</i> value | Adjusted<br>(95% CI) | <i>P</i> value | Control     | Intervention |                        |
| Indian/Pakistani/Bangladeshi | 62.1<br>(58.3, 65.9)                                                                | 61.0<br>(57.7, 64.4)     | -1.4<br>(-5.6, 2.8)                                                                         | 0.5            | -1.9<br>(-5.4, 1.7)  | 0.3            | 365         | 215          |                        |
| Other/Mixed                  | 60.7<br>(59.2, 62.3)                                                                | 58.1<br>(55.8, 60.5)     | -3.0<br>(-6.7, 0.7)                                                                         | 0.1            | -2.4<br>(-5.8, 1.1)  | 0.2            | 202         | 251          |                        |

Supplementary Table 4: Employment-status specific effect estimates for health outcomes

|                                                                         | Summary statistics                                                  |                          | Effect estimates                                                           |                |                      |                | Sample size |              | Overall<br><i>P</i><br>value |
|-------------------------------------------------------------------------|---------------------------------------------------------------------|--------------------------|----------------------------------------------------------------------------|----------------|----------------------|----------------|-------------|--------------|------------------------------|
|                                                                         | (mean of continuous variables,<br>prevalence of binary<br>outcomes) |                          | Rate ratio for binary outcomes, mean difference for<br>continuous outcomes |                |                      |                |             |              |                              |
|                                                                         | Control<br>(95% CI)                                                 | Intervention<br>(95% CI) | Unadjusted<br>(95% CI)                                                     | <i>P</i> value | Adjusted<br>(95% CI) | <i>P</i> value | Control     | Intervention |                              |
| <i>Primary health outcomes</i>                                          |                                                                     |                          |                                                                            |                |                      |                |             |              |                              |
| Healthy eating – meeting five-a-day (fruit and vegetable portions)<br>% |                                                                     |                          |                                                                            |                |                      |                |             |              | 0.3                          |
| In paid employment                                                      | 58.7<br>(52.7, 64.7)                                                | 61.0<br>(54.2, 67.7)     | 1.0<br>(0.9, 1.2)                                                          | 0.7            | 1.0<br>(0.9, 1.2)    | 0.4            | 782         | 766          |                              |
| ILO unemployed (seeking work)                                           | 46.9<br>(38.7, 55.1)                                                | 44.9<br>(37.9, 51.9)     | 0.9<br>(0.7, 1.3)                                                          | 0.7            | 0.9<br>(0.7, 1.3)    | 0.7            | 194         | 216          |                              |
| Full time education                                                     | 49.4<br>(41.4, 57.4)                                                | 51.2<br>(40.6, 61.6)     | 0.9<br>(0.6, 1.3)                                                          | 0.6            | 0.9<br>(0.6, 1.3)    | 0.7            | 251         | 268          |                              |
| Unable to work (disability/illness)                                     | 40.9<br>(31.4, 50.3)                                                | 46.5<br>(36.1, 56.9)     | 1.1<br>(0.8, 1.5)                                                          | 0.5            | 1.0<br>(0.8, 1.4)    | 0.4            | 115         | 114          |                              |
| Not employed not seeking/retired/ Carer/Other                           | 52.6                                                                | 56.8                     | 1.1                                                                        | 0.3            | 1.1                  | 0.3            | 483         | 428          |                              |

|                                                                                    | Summary statistics                                                  |                          | Effect estimates                                                           |                |                      |                | Sample size |              | Overall<br><i>P</i><br>value |
|------------------------------------------------------------------------------------|---------------------------------------------------------------------|--------------------------|----------------------------------------------------------------------------|----------------|----------------------|----------------|-------------|--------------|------------------------------|
|                                                                                    | (mean of continuous variables,<br>prevalence of binary<br>outcomes) |                          | Rate ratio for binary outcomes, mean difference for<br>continuous outcomes |                |                      |                | Control     | Intervention |                              |
|                                                                                    | Control<br>(95% CI)                                                 | Intervention<br>(95% CI) | Unadjusted<br>(95% CI)                                                     | <i>P</i> value | Adjusted<br>(95% CI) | <i>P</i> value | Control     | Intervention |                              |
|                                                                                    | (43.8, 61.4)                                                        | (50.7, 62.8)             | (0.9, 1.4)                                                                 |                | (0.9, 1.3)           |                |             |              |                              |
| Physical activity – meeting 5x30<br>mins moderate intensity activity<br>per week % |                                                                     |                          |                                                                            |                |                      |                |             |              | 0.06                         |
| In paid employment                                                                 | 73.0<br>(65.2, 80.8)                                                | 70.8<br>(64.8, 76.7)     | 1.0<br>(0.8, 1.1)                                                          | 0.6            | 0.9<br>(0.8, 1.1)    | 0.6            | 803         | 797          |                              |
| ILO unemployed (seeking<br>work)                                                   | 64.8<br>(55.4, 74.3)                                                | 75.6<br>(67.8, 83.3)     | 1.1<br>(1.0, 1.4)                                                          | 0.1            | 1.1<br>(1.0, 1.3)    | 0.2            | 199         | 225          |                              |
| Full time education                                                                | 73.6<br>(61.6, 82.5)                                                | 77.5<br>(71.7, 83.4)     | 1.1<br>(0.9, 1.3)                                                          | 0.3            | 1.1<br>(0.9, 1.2)    | 0.3            | 307         | 261          |                              |
| Unable to work<br>(disability/illness)                                             | 44.0<br>(31.9, 56.0)                                                | 40.9<br>(31.3, 50.5)     | 0.9<br>(0.7, 1.2)                                                          | 0.7            | 0.9<br>(0.7, 1.2)    | 0.7            | 116         | 115          |                              |
| Not employed not<br>seeking/retired/ Carer/Other                                   | 58.4<br>(49.1, 67.7)                                                | 61.1<br>(54.3, 68.0)     | 1.0<br>(0.7, 1.4)                                                          | 0.9            | 1.0<br>(0.7, 1.3)    | 0.9            | 495         | 440          |                              |



|                                       |                                                     | Summary statistics                                                  |                              | Effect estimates                                                           |                |                          |                | Sample size |              | Overall<br><i>P</i><br>value |
|---------------------------------------|-----------------------------------------------------|---------------------------------------------------------------------|------------------------------|----------------------------------------------------------------------------|----------------|--------------------------|----------------|-------------|--------------|------------------------------|
|                                       |                                                     | (mean of continuous variables,<br>prevalence of binary<br>outcomes) |                              | Rate ratio for binary outcomes, mean difference for<br>continuous outcomes |                |                          |                |             |              |                              |
|                                       |                                                     | Control<br><br>(95% CI)                                             | Intervention<br><br>(95% CI) | Unadjusted<br><br>(95% CI)                                                 | <i>P</i> value | Adjusted<br><br>(95% CI) | <i>P</i> value | Control     | Intervention |                              |
| <hr/>                                 |                                                     |                                                                     |                              |                                                                            |                |                          |                |             |              |                              |
| Mental Wellbeing Scale-<br>mean score |                                                     |                                                                     |                              |                                                                            |                |                          |                |             |              |                              |
|                                       | In paid employment                                  | 60.6<br><br>(59.1, 62.1)                                            | 59.5<br><br>(57.1, 61.8)     | -1.2<br><br>(-4.2, 1.9)                                                    | 0.4            | -1.1<br><br>(-3.7, 1.5)  | 0.2            | 797         | 780          |                              |
|                                       | ILO unemployed<br>(seeking work)                    | 60.2<br><br>(58.4, 61.9)                                            | 58.7<br><br>(56.8, 60.6)     | -1.2<br><br>(-4.0, 1.5)                                                    | 0.4            | -1.2<br><br>(-3.2, 0.9)  | 0.3            | 196         | 222          |                              |
|                                       | Full time education                                 | 60.7<br><br>(58.4, 63.1)                                            | 58.8<br><br>(55.8, 61.7)     | -1.3<br><br>(-4.6, 1.9)                                                    | 0.4            | -1.6<br><br>(-4.3, 1.1)  | 0.08           | 255         | 292          |                              |
|                                       | Unable to work<br>(disability/illness)              | 58.0<br><br>(54.6, 61.3)                                            | 53.4<br><br>(51.5, 55.2)     | -3.4<br><br>(-7.3, 0.6)                                                    | 0.09           | -2.7<br><br>(-6.3, 0.9)  | 0.2            | 113         | 111          |                              |
|                                       | Not employed not<br>seeking/retired/<br>Carer/Other | 59.5<br><br>(57.1, 61.8)                                            | 58.5<br><br>(56.5, 60.6)     | -1.4<br><br>(-3.6, 0.8)                                                    | 0.2            | -1.4<br><br>(-3.6, 0.9)  | 0.3            | 491         | 429          |                              |

Supplementary Table 5: Educational-level specific effect estimates for health outcomes

|                                                                      | Summary statistics                                            |                          | Effect estimates                                                        |                |                      |                | Sample size |              | Overall <i>P</i> value |
|----------------------------------------------------------------------|---------------------------------------------------------------|--------------------------|-------------------------------------------------------------------------|----------------|----------------------|----------------|-------------|--------------|------------------------|
|                                                                      | (mean of continuous variables, prevalence of binary outcomes) |                          | Rate ratio for binary outcomes, mean difference for continuous outcomes |                |                      |                | Control     | Intervention |                        |
|                                                                      | Control<br>(95% CI)                                           | Intervention<br>(95% CI) | Unadjusted<br>(95% CI)                                                  | <i>P</i> value | Adjusted<br>(95% CI) | <i>P</i> value | Control     | Intervention |                        |
| <i>Primary health outcomes</i>                                       |                                                               |                          |                                                                         |                |                      |                |             |              |                        |
| Healthy eating – meeting five-a-day (fruit and vegetable portions) % |                                                               |                          |                                                                         |                |                      |                |             |              | 0.1                    |
| No formal qualifications                                             | 51.9<br>(41.1, 63.7)                                          | 49.7<br>(40.1, 59.4)     | 1.0<br>(0.7, 1.4)                                                       | 0.9            | 1.1<br>(0.8, 1.4)    | 0.6            | 214         | 189          |                        |
| GCSE or equivalent                                                   | 46.5<br>(40.3, 52.6)                                          | 51.7<br>(45.4, 58.0)     | 1.0<br>(0.8, 1.3)                                                       | 0.6            | 1.1<br>(0.9, 1.4)    | 0.5            | 527         | 617          |                        |
| A-level or equivalent                                                | 59.4<br>(43.4, 55.5)                                          | 54.5<br>(47.6, 61.4)     | 1.1<br>(0.9, 1.3)                                                       | 0.4            | 1.1<br>(0.9, 1.3)    | 0.3            | 360         | 387          |                        |
| University degree                                                    | 61.1<br>(53.7)                                                | 62.5<br>(55.4, 69.7)     | 1.0<br>(0.8, 1.2)                                                       | 0.9            | 1.0<br>(0.8, 1.2)    | 0.7            | 676         | 563          |                        |
| Other                                                                | 58.3                                                          | 58.3                     | 1.1                                                                     | 0.8            | 1.3                  | 0.6            | 48          | 36           |                        |

|                                                                                    | Summary statistics<br>(mean of continuous variables,<br>prevalence of binary<br>outcomes) |                          | Effect estimates<br>Rate ratio for binary outcomes, mean difference for<br>continuous outcomes |                |                      |                | Sample size |              | Overall<br><i>P</i><br>value |
|------------------------------------------------------------------------------------|-------------------------------------------------------------------------------------------|--------------------------|------------------------------------------------------------------------------------------------|----------------|----------------------|----------------|-------------|--------------|------------------------------|
|                                                                                    | Control<br>(95% CI)                                                                       | Intervention<br>(95% CI) | Unadjusted<br>(95% CI)                                                                         | <i>P</i> value | Adjusted<br>(95% CI) | <i>P</i> value | Control     | Intervention |                              |
|                                                                                    | (38.9, 77.8)                                                                              | (39.3, 77.4)             | (0.7, 1.7)                                                                                     |                | (0.9, 1.8)           |                |             |              |                              |
| Physical activity – meeting 5x30<br>mins moderate intensity activity<br>per week % |                                                                                           |                          |                                                                                                |                |                      |                |             |              | 0.3                          |
| No formal qualifications                                                           | 46.8<br>(32.9, 60.7)                                                                      | 54.6<br>(45.0, 64.1)     | 1.0<br>(0.7, 1.4)                                                                              | 0.9            | 1.0<br>(0.8, 1.2)    | 0.8            | 220         | 196          |                              |
| GCSE or equivalent                                                                 | 68.4<br>(60.8, 76.0)                                                                      | 70.2<br>(65.4, 75.1)     | 1.0<br>(0.9, 1.3)                                                                              | 0.7            | 1.0<br>(0.8, 1.2)    | 0.9            | 538         | 642          |                              |
| A-level or equivalent                                                              | 68.1<br>(61.7, 74.5)                                                                      | 71.2<br>(64.1, 78.2)     | 1.0<br>(0.9, 1.2)                                                                              | 0.9            | 1.0<br>(0.9, 1.2)    | 0.9            | 373         | 416          |                              |
| University degree                                                                  | 70.6<br>(62.1, 79.2)                                                                      | 69.7<br>(63.8, 75.6)     | 1.0<br>(0.9, 1.2)                                                                              | 0.7            | 3                    | 0.8            | 691         | 591          |                              |
| Other                                                                              | 65.4<br>(50.3, 80.4)                                                                      | 56.4<br>(45.5, 67.3)     | 0.7<br>(0.6, 0.9)                                                                              | 0.09           | 1.0<br>(0.8, 1.5)    | 0.9            | 52          | 39           |                              |



|                             |              | Summary statistics                                                  |                          | Effect estimates                                                           |                |                      |                | Sample size |              | Overall<br><i>P</i><br>value |
|-----------------------------|--------------|---------------------------------------------------------------------|--------------------------|----------------------------------------------------------------------------|----------------|----------------------|----------------|-------------|--------------|------------------------------|
|                             |              | (mean of continuous variables,<br>prevalence of binary<br>outcomes) |                          | Rate ratio for binary outcomes, mean difference for<br>continuous outcomes |                |                      |                |             |              |                              |
|                             |              | Control<br>(95% CI)                                                 | Intervention<br>(95% CI) | Unadjusted<br>(95% CI)                                                     | <i>P</i> value | Adjusted<br>(95% CI) | <i>P</i> value | Control     | Intervention |                              |
| mean score                  |              |                                                                     |                          |                                                                            |                |                      |                |             |              |                              |
| No formal<br>qualifications | 61.5         | 60.3                                                                | -1.4                     | 0.6                                                                        | -0.7           | 0.8                  | 215            | 193         |              |                              |
|                             | (57.0, 66.0) | (57.7, 62.9)                                                        | (-7.2, 4.3)              |                                                                            | (-6.3, 4.9)    |                      |                |             |              |                              |
| GCSE or equivalent          | 60.1         | 59.0                                                                | -1.8                     | 0.1                                                                        | -2.2           | 0.05                 | 627            | 527         |              |                              |
|                             | (58.2, 61.2) | (59.8, 61.2)                                                        | (-4.3, 0.6)              |                                                                            | (-4.4, 0.0)    |                      |                |             |              |                              |
| A-level or equivalent       | 58.9         | 56.7                                                                | -2.0                     | 0.2                                                                        | -2.7           | 0.04                 | 365            | 399         |              |                              |
|                             | (57.0, 60.8) | (54.9, 58.5)                                                        | (-5.1, 1.1)              |                                                                            | (-5.1, -0.2)   |                      |                |             |              |                              |
| University degree           | 60.9         | 59.4                                                                | -1.6                     | 0.2                                                                        | -1.6           | 0.1                  | 685            | 579         |              |                              |
|                             | (59.3, 62.5) | (57.0, 61.7)                                                        | (-4.1, 0.9)              |                                                                            | (-3.7, 0.4)    |                      |                |             |              |                              |
| Other                       | 53.0         | 54.4                                                                | -1.4                     | 0.7                                                                        | -1.5           | 0.5                  | 52             | 37          |              |                              |
|                             | (50.5, 55.5) | (52.1, 56.8)                                                        | (-8.5, 5.8)              |                                                                            | (-4.6, 1.6)    |                      |                |             |              |                              |
